# Supplementary material for: Phenology Information Contributes to Reduce Temporal Basis Risk in Agricultural Weather Index Insurance
Source: Springer Nature journal article supplement (doi:10.1038/s41598-017-18656-5), 2018-01-02
Supplement: MOESM1 [file 41598_2017_18656_MOESM1_ESM.pdf]

1 Phenology Information Contributes to Reduce Temporal Basis Risk in Agricultural Weather  
2 Index Insurance

3

4

5

6

7

8 Tobias Dalhaus<sup>1\*</sup>, Oliver Musshoff<sup>2</sup>, Robert Finger<sup>1</sup>

9

10

11

12

13

14 <sup>1</sup> Agricultural Economics and Policy Group, ETH Zürich, Sonneggstrasse 33, 8092 Zurich,  
15 Switzerland

16 <sup>2</sup> Department of Agricultural Economics and Rural Development, Georg August University  
17 Göttingen, Platz der Göttinger Sieben 5, 37073 Göttingen, Germany

18

19

20

21 \* Correspondence to [tdalhaus@ethz.ch](mailto:tdalhaus@ethz.ch)

22 **ONLINE SUPPLEMENTARY INFORMATION**

23 **Table A1: Correlation Matrix: Precipitation in growing phases**

|                    | GDD  | Yearly Reporter | Immediate Reporter |
|--------------------|------|-----------------|--------------------|
| GDD                | 1    |                 |                    |
| Yearly Reporter    | 0.24 | 1               |                    |
| Immediate Reporter | 0.16 | 0.58            | 1                  |

24

25 *Summary Results*

26 To give a general overview about the differences across the growth stage estimation approaches,  
 27 table A2 displays temporal gaps between the estimated timings. Hence, the GDD approach  
 28 systematically estimates the occurrence of the ‘stem elongation growth’ stage ( $d_{\text{start};\text{GDD}}$ ) around  
 29 a month earlier than the two reporting networks observe. In single outliers’ cases these  
 30 difference can increase up to 132 days, which leads to unrealistic dates. Note that all estimated  
 31 (GDD) and observed (Yearly and Immediate Reporters network) dates are included in the online  
 32 appendix.

33 For the second growing stage of interest, GDD estimates ‘anthesis’ ( $d_{\text{end};\text{GDD}}$ ) while the reporters  
 34 only capture the actually earlier but less drought sensitive ‘ear emergence’ growing stage  
 35 ( $d_{\text{end};\text{imm}}$   $d_{\text{end};\text{year}}$ ). GDD estimate is still around 20 days earlier than the reporters. However, this  
 36 misspecification is mainly caused by the former mentioned issue of estimating ‘stem  
 37 elongation’ timing.

38 The median difference between Yearly and Immediate phenology Reporters is close to zero  
 39 days for both phases. However, for single reports this difference can be up to 68 days. These  
 40 differences arise from distance between single yearly and immediate reporters’ locations as well  
 41 as different reporting strategies (see section 3.2).

42

43 **Table A2: Differences in estimated timings in days**

| Approaches                                               | Stem Elongation | Ear Emergence/ Anthesis |
|----------------------------------------------------------|-----------------|-------------------------|
| Difference between Yearly Reporters' and GDD Dates       |                 |                         |
| <i>Median</i>                                            | 37              | 21                      |
| <i>Min</i>                                               | -6              | -23                     |
| <i>Max</i>                                               | 132             | 76                      |
| Difference between Immediate Reporters' and GDD Dates    |                 |                         |
| <i>Median</i>                                            | 33              | 20                      |
| <i>Min</i>                                               | -26             | -19                     |
| <i>Max</i>                                               | 123             | 64                      |
| Difference between Yearly and Immediate Reporters' Dates |                 |                         |
| <i>Median</i>                                            | 2               | 0                       |
| <i>Min</i>                                               | -68             | -26                     |
| <i>max</i>                                               | 54              | 34                      |

44

45 Table A3 summarizes WII contract parameters across the different approaches of growth stage  
 46 determination. The aforementioned early estimated dates of the GDD approach lead to the fact  
 47 that the insured rainfall period is longer and shifted into a period in which higher rainfall is  
 48 more likely. Resulting strike levels that have to be undercut to trigger an insurance payout are  
 49 higher compared to case when insuring via phenology reporting networks. Medium as well as  
 50 maximum WII premium rates reflect a high drought risk exposure, as expected in this region.  
 51 On average, an indemnification of the WII (i.e. net payouts are positive) in 4.10 out 15 years  
 52 for the GDD approach, 6.03 years for Yearly and 5.28 years for Immediate Reports. Thus,  
 53 farmers using WII based on phenology reporters' data receive an indemnification of 29% to  
 54 47% more likely compared to GDD case. Even though this might increase transaction costs, not  
 55 too rare indemnification is seen as important determinant of the success of WII [1].

56 The differences in the variable ‘number of insured farms’ are due to the fact that we restricted  
 57 the insurance only to be concluded if the sign of the estimated relationship between yield and  
 58 rainfall was positive. That means, if our regression detected a higher negative influence of  
 59 excessive rainfall compared to low rainfalls’ influence in the given growing stage, we dropped  
 60 these cases as we assumed the farmers not to conclude an insurance contract then. Furthermore,  
 61 for 8 farms there was no Immediate Reporters’ data available in the farms natural region.

62

63 **Table A3: Summary Statistics of Insurance Contract Parameters for  $\alpha=1$  across all 29 case**  
 64 **Study Farms.**

| Data Source                                                                    | GDD     | Yearly Reporter | Immediate Reporter |
|--------------------------------------------------------------------------------|---------|-----------------|--------------------|
| Strike Level [mm precipitation/m <sup>2</sup> ]                                |         |                 |                    |
| <i>Median</i>                                                                  | 191.64  | 122.91          | 125.31             |
| <i>Min</i>                                                                     | 128.04  | 47.20           | 66.82              |
| <i>Max</i>                                                                     | 1903.23 | 507.02          | 360.78             |
| Premium [€/ha]                                                                 |         |                 |                    |
| <i>Median</i>                                                                  | 61.17   | 62.74           | 77.39              |
| <i>Min</i>                                                                     | 7.78    | 8.89            | 16.71              |
| <i>Max</i>                                                                     | 162.82  | 166.64          | 166.80             |
| Average Number of positive net Payouts (payout minus premium; out of 15 years) |         |                 |                    |
| <i>Mean</i>                                                                    | 4.10    | 6.03            | 5.28               |
| Number of insured out of 29 farms*                                             |         |                 |                    |
|                                                                                | 15      | 24              | 21                 |

65 \*Note that we assumed the insurance contract to be concluded only if the slope coefficient of QR was  
 66 positive and if phenology reporters’ data was available.

67 For full information about the variables see the online appendix.

68

69 **Table A4: Average Changes of Risk Premium in Percentage Terms, WII compared to**  
70 **uninsured Scenario**

| Coefficient of relative risk<br>aversion $r_r$ | Yearly Reporters<br>vs.<br>Uninsured | Immediate Reporters<br>vs.<br>Uninsured | GDD<br>vs.<br>Uninsured |
|------------------------------------------------|--------------------------------------|-----------------------------------------|-------------------------|
| 0 (risk neutral)                               |                                      |                                         |                         |
| 0.5                                            | - 6.25                               | -2.19                                   | - 0.34                  |
| 1                                              | - 6.39                               | -2.31                                   | - 0.45                  |
| 2                                              | - 6.66                               | -2.52                                   | - 0.68                  |
| 3                                              | - 6.91                               | - 2.72                                  | - 0.91                  |
| 4 (extremely risk averse)                      | - 7.14                               | - 2.89                                  | - 1.13                  |

71

72

73 *Sensitivity Analyses*

74 **Table A5 Results RQ1: Tests for risk reducing properties of different WII compared to no**  
75 **insurance (Wheat Price changed to 20€/dt)**

---

| Coefficient of relative risk<br>aversion $r_r$ | $H_0: EU_{\text{year}} \geq EU_{\text{noins}}$ | $H_0: EU_{\text{imm}} \geq EU_{\text{noins}}$ | $H_0: EU_{\text{GDD}} \geq EU_{\text{noins}}$ |
|------------------------------------------------|------------------------------------------------|-----------------------------------------------|-----------------------------------------------|
|                                                | p- value                                       |                                               |                                               |
| 0 (risk neutral)                               | 0.62                                           | 0.29                                          | 0.93                                          |
| 0.5                                            | $3.27 \cdot 10^{-2}$                           | $4.76 \cdot 10^{-2}$                          | 0.85                                          |
| 1                                              | $2.35 \cdot 10^{-2}$                           | $7.49 \cdot 10^{-3}$                          | 0.60                                          |
| 2                                              | $6.73 \cdot 10^{-3}$                           | $9.94 \cdot 10^{-3}$                          | 0.60                                          |
| 3                                              | $5.73 \cdot 10^{-3}$                           | $1.43 \cdot 10^{-2}$                          | 0.56                                          |
| 4 (extremely risk averse)                      | $4.11 \cdot 10^{-3}$                           | $1.31 \cdot 10^{-2}$                          | 0.49                                          |

---

76

77

78

79 **Table A6 Results RQ2: Comparing risk reducing properties between WII**  
 80 **(Wheat Price changed to 20€/dt)**

| Coefficient of relative risk<br>aversion $r_r$ | $H_0: EU_{year} \geq EU_{imm}$ | $H_0: EU_{year} \geq EU_{GDD}$ | $H_0: EU_{imm} \geq EU_{GDD}$ |
|------------------------------------------------|--------------------------------|--------------------------------|-------------------------------|
|                                                | p-value                        |                                |                               |
| 0 (risk neutral)                               | 0.50                           | 0.24                           | 0.17                          |
| 0.5                                            | 0.27                           | $3.77 \cdot 10^{-2}$           | $6.32 \cdot 10^{-2}$          |
| 1                                              | 0.33                           | $3.77 \cdot 10^{-2}$           | $4.46 \cdot 10^{-2}$          |
| 2                                              | 0.12                           | $2.24 \cdot 10^{-2}$           | $5.02 \cdot 10^{-2}$          |
| 3                                              | 0.11                           | $2.11 \cdot 10^{-2}$           | $6.32 \cdot 10^{-2}$          |
| 4 (extremely risk averse)                      | 0.10                           | $1.98 \cdot 10^{-2}$           | $9.20 \cdot 10^{-2}$          |

81

82

83 **Table A7 Results RQ1: Tests for risk reducing properties of different WII compared to no**  
 84 **insurance (Wheat Price changed to 10€/dt)**

| Coefficient of relative risk<br>aversion $r_r$ | $H_0: EU_{\text{year}} \geq EU_{\text{noins}}$ | $H_0: EU_{\text{imm}} \geq EU_{\text{noins}}$ | $H_0: EU_{\text{GDD}} \geq EU_{\text{noins}}$ |
|------------------------------------------------|------------------------------------------------|-----------------------------------------------|-----------------------------------------------|
|                                                | p- value                                       |                                               |                                               |
| 0 (risk neutral)                               | 0.62                                           | 0.29                                          | 0.93                                          |
| 0.5                                            | $4.46 \cdot 10^{-2}$                           | $8.22 \cdot 10^{-2}$                          | 0.88                                          |
| 1                                              | $3.06 \cdot 10^{-2}$                           | $9.05 \cdot 10^{-3}$                          | 0.69                                          |
| 2                                              | $7.88 \cdot 10^{-3}$                           | $9.94 \cdot 10^{-3}$                          | 0.62                                          |
| 3                                              | $6.21 \cdot 10^{-3}$                           | $1.31 \cdot 10^{-2}$                          | 0.53                                          |
| 4 (extremely risk averse)                      | $4.88 \cdot 10^{-3}$                           | $1.31 \cdot 10^{-2}$                          | 0.58                                          |

85

86

87



88 **Table A8 Results RQ2: Comparing risk reducing properties between WII**  
 89 **(Wheat Price changed to 10€/dt)**

| Coefficient of relative risk<br>aversion $r_r$ | $H_0: EU_{year} \geq EU_{imm}$ | $H_0: EU_{year} \geq EU_{GDD}$ | $H_0: EU_{imm} \geq EU_{GDD}$ |
|------------------------------------------------|--------------------------------|--------------------------------|-------------------------------|
|                                                | p-value                        |                                |                               |
| 0 (risk neutral)                               | 0.50                           | 0.24                           | 0.17                          |
| 0.5                                            | 0.30                           | $3.37 \cdot 10^{-2}$           | $5.97 \cdot 10^{-2}$          |
| 1                                              | 0.35                           | $3.98 \cdot 10^{-2}$           | $3.94 \cdot 10^{-2}$          |
| 2                                              | 0.16                           | $2.53 \cdot 10^{-2}$           | $4.19 \cdot 10^{-2}$          |
| 3                                              | 0.11                           | $2.11 \cdot 10^{-2}$           | $5.97 \cdot 10^{-2}$          |
| 4 (extremely risk averse)                      | 0.11                           | $1.86 \cdot 10^{-2}$           | $7.06 \cdot 10^{-2}$          |

90

91

92 **Table A9 Results RQ1: Tests for risk reducing properties of different WII compared to no**  
 93 **insurance (initial wealth changed to 200€/ha)**

| Coefficient of relative risk<br>aversion $r_r$ | $H_0: EU_{year} \geq EU_{noins}$ | $H_0: EU_{imm} \geq EU_{noins}$ | $H_0: EU_{GDD} \geq EU_{noins}$ |
|------------------------------------------------|----------------------------------|---------------------------------|---------------------------------|
|                                                | p- value                         |                                 |                                 |
| 0 (risk neutral)                               | 0.62                             | 0.29                            | 0.93                            |
| 0.5                                            | $3.27 \cdot 10^{-2}$             | $4.42 \cdot 10^{-2}$            | 0.84                            |
| 1                                              | $2.35 \cdot 10^{-2}$             | $8.24 \cdot 10^{-3}$            | 0.60                            |
| 2                                              | $6.73 \cdot 10^{-3}$             | $9.94 \cdot 10^{-3}$            | 0.58                            |
| 3                                              | $5.73 \cdot 10^{-3}$             | $1.43 \cdot 10^{-2}$            | 0.56                            |
| 4 (extremely risk averse)                      | $3.78 \cdot 10^{-3}$             | $1.31 \cdot 10^{-2}$            | 0.49                            |

94

95

96

97 **Table A10 Results RQ2: Comparing risk reducing properties between WII**  
 98 **(initial wealth changed to 200€/dt)**

| Coefficient of relative risk<br>aversion $r_r$ | $H_0: EU_{\text{year}} \geq EU_{\text{imm}}$ | $H_0: EU_{\text{year}} \geq EU_{\text{GDD}}$ | $H_0: EU_{\text{imm}} \geq EU_{\text{GDD}}$ |
|------------------------------------------------|----------------------------------------------|----------------------------------------------|---------------------------------------------|
|                                                | p-value                                      |                                              |                                             |
| 0 (risk neutral)                               | 0.50                                         | 0.24                                         | 0.17                                        |
| 0.5                                            | 0.27                                         | $3.77 \cdot 10^{-2}$                         | $6.32 \cdot 10^{-2}$                        |
| 1                                              | 0.32                                         | $3.77 \cdot 10^{-2}$                         | $4.73 \cdot 10^{-2}$                        |
| 2                                              | 0.12                                         | $2.24 \cdot 10^{-2}$                         | $5.02 \cdot 10^{-2}$                        |
| 3                                              | 0.11                                         | $2.11 \cdot 10^{-2}$                         | $6.32 \cdot 10^{-2}$                        |
| 4 (extremely risk averse)                      | 0.10                                         | $1.86 \cdot 10^{-2}$                         | $8.74 \cdot 10^{-2}$                        |

99

100

101 **Table A11 Results RQ1: Tests for risk reducing properties of different WII compared to**  
 102 **no insurance (initial wealth changed to 350€/ha)**

| Coefficient of relative risk<br>aversion $r_r$ | $H_0: EU_{\text{year}} \geq EU_{\text{noins}}$ | $H_0: EU_{\text{imm}} \geq EU_{\text{noins}}$ | $H_0: EU_{\text{GDD}} \geq EU_{\text{noins}}$ |
|------------------------------------------------|------------------------------------------------|-----------------------------------------------|-----------------------------------------------|
|                                                | p- value                                       |                                               |                                               |
| 0 (risk neutral)                               | 0.62                                           | 0.29                                          | 0.93                                          |
| 0.5                                            | $3.48 \cdot 10^{-2}$                           | $7.22 \cdot 10^{-2}$                          | 0.84                                          |
| 1                                              | $2.87 \cdot 10^{-2}$                           | $9.05 \cdot 10^{-3}$                          | 0.64                                          |
| 2                                              | $6.73 \cdot 10^{-3}$                           | $1.09 \cdot 10^{-2}$                          | 0.60                                          |
| 3                                              | $5.73 \cdot 10^{-3}$                           | $1.43 \cdot 10^{-2}$                          | 0.51                                          |
| 4 (extremely risk averse)                      | $4.86 \cdot 10^{-3}$                           | $1.31 \cdot 10^{-2}$                          | 0.56                                          |

103

104

105

106 **Table A12 Results RQ2: Comparing risk reducing properties between WII**  
 107 **(initial wealth changed to 350€/dt)**

| Coefficient of relative risk<br>aversion $r_r$ | $H_0: EU_{\text{year}} \geq EU_{\text{imm}}$ | $H_0: EU_{\text{year}} \geq EU_{\text{GDD}}$ | $H_0: EU_{\text{imm}} \geq EU_{\text{GDD}}$ |
|------------------------------------------------|----------------------------------------------|----------------------------------------------|---------------------------------------------|
|                                                | p-value                                      |                                              |                                             |
| 0 (risk neutral)                               | 0.50                                         | 0.24                                         | 0.17                                        |
| 0.5                                            | 0.27                                         | $3.37 \cdot 10^{-2}$                         | $6.32 \cdot 10^{-2}$                        |
| 1                                              | 0.36                                         | $3.77 \cdot 10^{-2}$                         | $3.71 \cdot 10^{-2}$                        |
| 2                                              | 0.15                                         | $2.68 \cdot 10^{-2}$                         | $4.46 \cdot 10^{-2}$                        |
| 3                                              | 0.10                                         | $2.11 \cdot 10^{-2}$                         | $5.97 \cdot 10^{-2}$                        |
| 4 (extremely risk averse)                      | 0.11                                         | $1.86 \cdot 10^{-2}$                         | $7.86 \cdot 10^{-2}$                        |

108

109

110 **Table A13 Results RQ1: Tests for risk reducing properties of different WII compared to**  
 111 **no insurance (loading 10%)**

| Coefficient of relative risk<br>aversion $r_r$ | $H_0: EU_{\text{year}} \geq EU_{\text{noins}}$ | $H_0: EU_{\text{imm}} \geq EU_{\text{noins}}$ | $H_0: EU_{\text{GDD}} \geq EU_{\text{noins}}$ |
|------------------------------------------------|------------------------------------------------|-----------------------------------------------|-----------------------------------------------|
|                                                | p- value                                       |                                               |                                               |
| 0 (risk neutral)                               | 0.99                                           | 0.99                                          | 1.00                                          |
| 0.5                                            | 0.99                                           | 0.99                                          | 1.00                                          |
| 1                                              | 0.99                                           | 0.99                                          | 1.00                                          |
| 2                                              | 0.99                                           | 0.99                                          | 1.00                                          |
| 3                                              | 0.99                                           | 0.99                                          | 1.00                                          |
| 4 (extremely risk averse)                      | 0.95                                           | 0.99                                          | 0.99                                          |

112

113 When adding a loading factor of 10% to the insurance premiums, none of the insurances reduces  
 114 the financial exposure to risk any longer. This was to be expected, as we only insure a single  
 115 peril. For a marketable insurance product multiple weather risks should be combined and a  
 116 whole farm risk management strategy should be developed. As we only compare the different  
 117 options GDD, yearly reporter and immediate reporter to reduce temporal basis risk of the  
 118 rainfall component of a WII, results displayed in table A13 do not change the general  
 119 conclusions drawn in the main paper.

120

121 **Table A14 Results RQ2: Comparing risk reducing properties between WII (loading 10%)**

| Coefficient of relative risk<br>aversion $r_r$ | $H_0: EU_{\text{year}} \geq EU_{\text{imm}}$ | $H_0: EU_{\text{year}} \geq EU_{\text{GDD}}$ | $H_0: EU_{\text{imm}} \geq EU_{\text{GDD}}$ |
|------------------------------------------------|----------------------------------------------|----------------------------------------------|---------------------------------------------|
|                                                | p-value                                      |                                              |                                             |
| 0 (risk neutral)                               | 0.92                                         | 0.53                                         | 0.19                                        |
| 0.5                                            | 0.88                                         | 0.36                                         | 0.17                                        |
| 1                                              | 0.81                                         | 0.23                                         | 0.13                                        |
| 2                                              | 0.69                                         | $6.03 \cdot 10^{-2}$                         | 0.10                                        |
| 3                                              | 0.46                                         | $4.16 \cdot 10^{-2}$                         | $7.57 \cdot 10^{-2}$                        |
| 4 (extremely risk averse)                      | 0.34                                         | $3.19 \cdot 10^{-2}$                         | 0.11                                        |

122

123

124 When adding a loading factor of 10% to the insurance premium, the superiority of yearly and  
 125 immediate reporter based WII compared to GDD vanishes. This is due to the fact, that the GDD  
 126 based insurance comes with a lower overall absolute premium compared to yearly and  
 127 immediate reporter based WII as shown in table A3. Hence, the loading factor is more  
 128 pronounced in the reporter based WIIs as the absolute loading is higher in these cases. The  
 129 resulting loss in the expected value of revenues is thus higher in the case of yearly and  
 130 immediate reporter based WIIs, when adding a loading factor. This higher loss in revenues  
 131 drives the expected utility calculations for table A14. Resulting, the three insurances are no  
 132 longer comparable when adding a loading factor. Tables A15 and A16 show the results when  
 133 adding an absolute loading of 10€/ha instead of a loading factor, coming to similar results as  
 134 displayed in the main paper.

135

136

137 **Table A15 Results RQ1: Tests for risk reducing properties of different WII compared to**  
 138 **no insurance (loading 10€/ha)**

| Coefficient of relative risk<br>aversion $r_r$ | $H_0: EU_{\text{year}} \geq EU_{\text{noins}}$ | $H_0: EU_{\text{imm}} \geq EU_{\text{noins}}$ | $H_0: EU_{\text{GDD}} \geq EU_{\text{noins}}$ |
|------------------------------------------------|------------------------------------------------|-----------------------------------------------|-----------------------------------------------|
|                                                | p- value                                       |                                               |                                               |
| 0 (risk neutral)                               | 0.99                                           | 0.99                                          | 1.00                                          |
| 0.5                                            | 0.99                                           | 0.99                                          | 1.00                                          |
| 1                                              | 0.99                                           | 0.99                                          | 1.00                                          |
| 2                                              | 0.99                                           | 0.99                                          | 1.00                                          |
| 3                                              | 0.99                                           | 0.99                                          | 1.00                                          |
| 4 (extremely risk averse)                      | 0.99                                           | 0.99                                          | 0.99                                          |

139

140



141 **Table A16 Results RQ2: Comparing risk reducing properties between WII (loading**  
 142 **10€/ha)**

| Coefficient of relative risk<br>aversion $r_r$ | $H_0: EU_{year} \geq EU_{imm}$ | $H_0: EU_{year} \geq EU_{GDD}$ | $H_0: EU_{imm} \geq EU_{GDD}$ |
|------------------------------------------------|--------------------------------|--------------------------------|-------------------------------|
|                                                | p-value                        |                                |                               |
| 0 (risk neutral)                               | 0.87                           | 0.36                           | 0.05                          |
| 0.5                                            | 0.83                           | $1.31 \cdot 10^{-3}$           | $1.68 \cdot 10^{-3}$          |
| 1                                              | 0.83                           | $5.80 \cdot 10^{-4}$           | $3.05 \cdot 10^{-4}$          |
| 2                                              | 0.60                           | $4.27 \cdot 10^{-4}$           | $2.14 \cdot 10^{-4}$          |
| 3                                              | 0.50                           | $3.05 \cdot 10^{-4}$           | $4.27 \cdot 10^{-4}$          |
| 4 (extremely risk averse)                      | 0.45                           | $3.05 \cdot 10^{-4}$           | $3.05 \cdot 10^{-4}$          |

143

144

145   **REFERENCES**

- 146   Vargas-Hill, R., Robles, M. Ceballos, F. Demand for a Simple Weather Insurance Product in  
147       India: Theory and Evidence. *Am. J. Agr. Econ.* **98** (4), 1250-1270 (2016).
